# Supplementary material for: Loss of PPARγ Expression and Signaling Is a Key Feature of Cutaneous Actinic Disease and Squamous Cell Carcinoma: Association With Tumor Stromal Inflammation
Source: Preprints.org preprint supplement (doi:10.20944/preprints202407.0153.v1), 2024-07-02
Supplement: Supplementary file 2 [file supplementary]

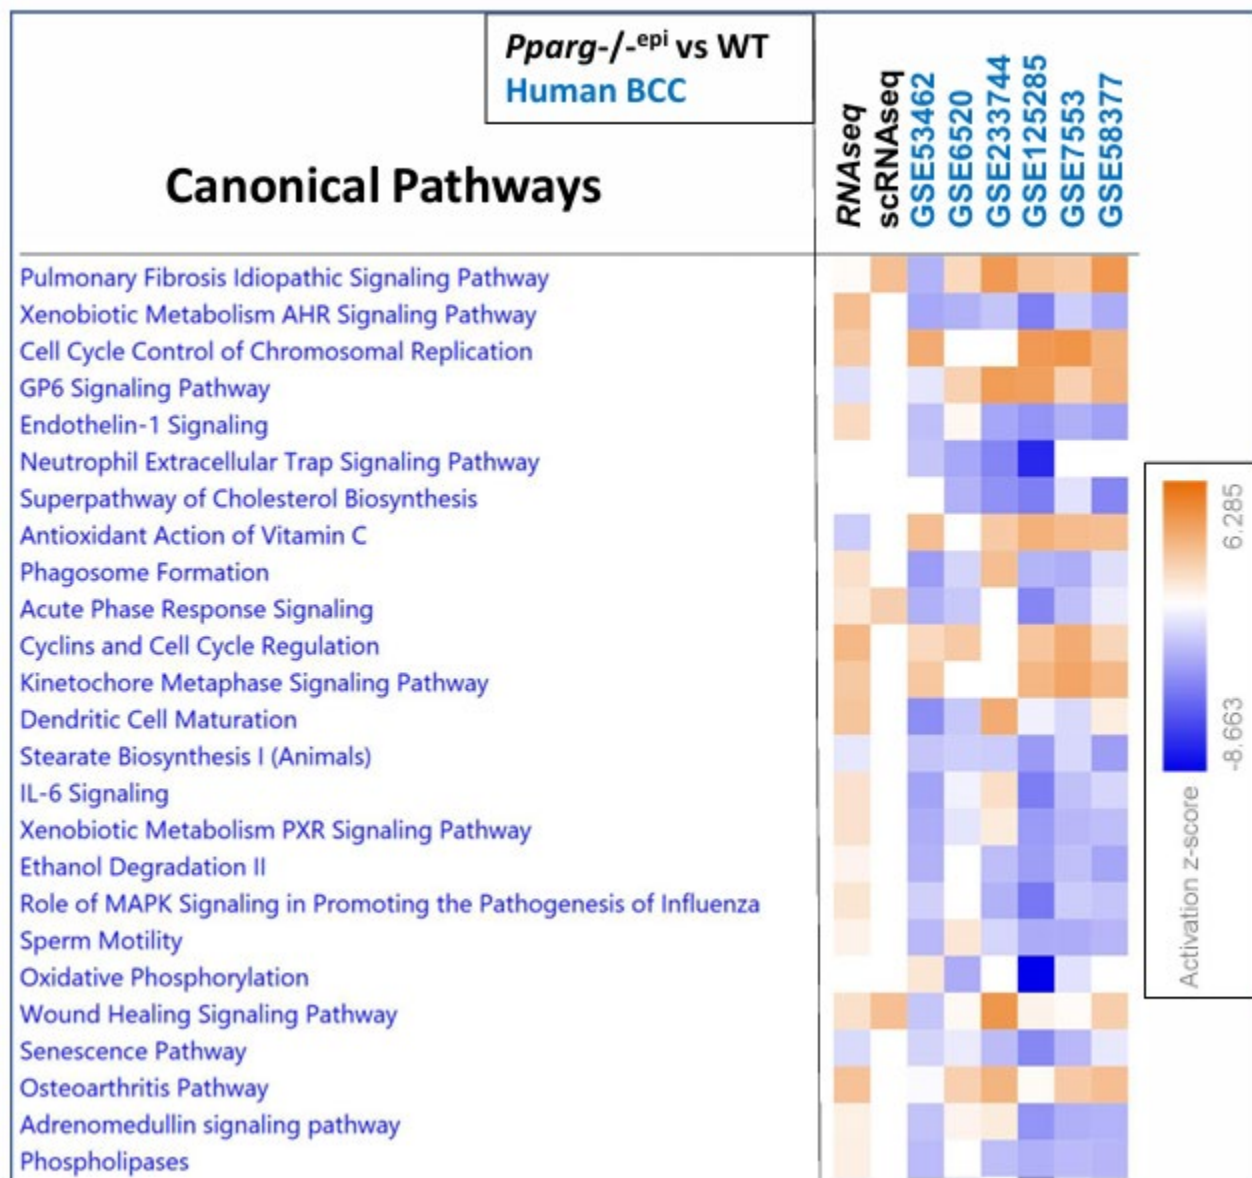

**Figure S4: Top Canonical Pathways that are common to *Pparg*<sup>-/-epi</sup> mice and human BCC.** After uploading DEG data for *Pparg*<sup>-/-epi</sup> mouse whole transcriptomic RNA sequencing (RNAseq), *Pparg*<sup>-/-epi</sup> single cell RNA sequencing (scRNAseq), and BCC datasets to Qiagen's Ingenuity Pathway Analysis, a comparison analysis was performed for Canonical Pathways. The heat map shows the top 25 Canonical Pathways that are common to *Pparg*<sup>-/-epi</sup> mouse skin, human SCC and mouse SCC transcriptomic datasets (ranked by z-score).
