# Supplementary material for: Loss of PPARγ Expression and Signaling Is a Key Feature of Cutaneous Actinic Disease and Squamous Cell Carcinoma: Association With Tumor Stromal Inflammation
Source: Preprints.org preprint supplement (doi:10.20944/preprints202407.0153.v1), 2024-07-02
Supplement: Supplementary file 4 [file supplementary]

**Table S4: Published Transcriptomic datasets used for analysis**

| Mouse cSCC vs Normal |                                    |                                                                                                            |                                                                                                                                      |      |
|----------------------|------------------------------------|------------------------------------------------------------------------------------------------------------|--------------------------------------------------------------------------------------------------------------------------------------|------|
| STUDY                | SAMPLE TYPE                        | <i>Ppar</i> Expression<br>Log2FC (Adj p-value)<br>or (Exp p-value )*                                       | METHODOLOGY                                                                                                                          | REF  |
| GSE84292             | SCC (n=6)<br>SES (n=6)             | <i>Ppara</i> = -1.240 (2.61E-04)<br><i>Ppard</i> = 1.034 (2.90E-04)<br><i>Pparg</i> = -2.358 (2.85E-05)    | UV-induced mouse tumors.<br>Whole transcriptome, Illumina HiSeq 2000                                                                 | [72] |
| GSE63967             | SCC (n=10)<br>Control (n=9)        | <i>Ppara</i> = -1.944 (4.39E-07)<br><i>Ppard</i> = 1.186 (6.77E-06)<br><i>Pparg</i> = -2.297 (1.41E-06)    | DMBA/TPA-induced tumors and matched dorsal skin.<br>Affymetrix Mouse Gene 1.1 ST Array                                               | [73] |
| GSE63967             | Spindle SCC (n=6)<br>Control (n=9) | <i>Ppara</i> = -2.100 (4.92E-08)*<br><i>Ppard</i> = 0.380 (9.21E-02)*<br><i>Pparg</i> = -1.810 (1.35E-05)* | DMBA/TPA-induced tumors and matched dorsal skin.<br>Affymetrix Mouse Gene 1.1 ST Array                                               | [73] |
| GSE19616             | SCC (n=5)<br>Control (n=4)         | <i>Ppara</i> = -2.346 (1.67E-05)*<br><i>Ppard</i> = 0.085 (5.25E-01)*<br><i>Pparg</i> = -2.675 (2.42E-06)* | Spontaneous tumors: <i>Rb</i> & <i>Tp53</i> epidermal specific knockout (Testing dataset).<br>Affymetrix Mouse Genome 430 2.0 Array  | [74] |
| GSE19616             | SCC (n=7)<br>Control (n=4)         | <i>Ppara</i> = -2.690 (3.69E-05)*<br><i>Ppard</i> = 0.377 (3.66E-01)*<br><i>Pparg</i> = -2.830 (5.43E-08)* | Spontaneous tumors: <i>Tp53</i> epidermal specific knockout (Testing dataset).<br>Affymetrix Mouse Genome 430 2.0 Array              | [74] |
| GSE11990             | SCC (n=8)<br>Control (n=5)         | <i>Ppara</i> = -1.860 (1.23E-02)<br><i>Ppard</i> = 1.351 (3.93E-02)<br><i>Pparg</i> = -1.932 (5.20E-02)    | Spontaneous tumors: <i>Rb</i> & <i>Tp53</i> epidermal specific knockout (Training dataset).<br>Affymetrix Mouse Genome 430 2.0 Array | [74] |
| GSE11990             | SCC (n=7)<br>Control (n=5)         | <i>Ppara</i> = -2.221 (1.27E-04)                                                                           | Spontaneous tumors: <i>Tp53</i> epidermal specific knockout (Training dataset).                                                      | [74] |

|                                                         |                                                    | <i>Ppard</i> = 0.566 (2.14E-01)<br><i>Pparg</i> = -2.859 (3.49E-06)                                     | Affymetrix Mouse Genome 430 2.0 Array                                                                                                                                    |      |
|---------------------------------------------------------|----------------------------------------------------|---------------------------------------------------------------------------------------------------------|--------------------------------------------------------------------------------------------------------------------------------------------------------------------------|------|
| GSE89462                                                | cSCC (n=3)<br>Control (n=3)                        | <i>Ppara</i> = -1.240 (2.61E-04)<br><i>Ppard</i> = 1.034 (2.90E-04)<br><i>Pparg</i> = -4.877 (8.02E-04) | Mouse DMBA/PMA-induced SCC<br>Agilent-028005 SurePrint G3 Mouse GE 8x60K Microarray                                                                                      |      |
| <b>Sun-exposed skin (SES) vs Non-exposed skin (NES)</b> |                                                    |                                                                                                         |                                                                                                                                                                          |      |
| STUDY                                                   | SAMPLE TYPE                                        | PPAR Expression<br>Log2FC (Adj p-value)<br>or (Exp p-value)*-                                           | METHODOLOGY                                                                                                                                                              | REF  |
| GSE98774                                                | SES (n=20)<br>NES (n=16)                           | <i>PPARA</i> = 0.267 (5.08E-01)<br><i>PPARD</i> = -0.248 (5.67E-01)<br><i>PPARG</i> = 0.583 (3.50E-01)  | Affymetrix Human Genome U133 Plus 2.0 Array                                                                                                                              | UN   |
| GSE142108                                               | SES (n=15)<br>NES (n=15)                           | <i>PPARA</i> = 0.145 (1.00E00)<br><i>PPARD</i> = -0.028 (1.00E00)<br><i>PPARG</i> = 0.874 (9.52E-01)    | Affymetrix Clariom S Assay, Human                                                                                                                                        | [75] |
| Kita & Fraser, 2016                                     | SES (n=302)<br>NES (n=196)                         | <i>PPARA</i> = ND<br><i>PPARD</i> = ND<br><i>PPARG</i> = ND                                             | Analysis of GTEX portal data. DEGs analyzed by DESeq2. Report 522 genes with > 2-fold change and FDR < 0.01.                                                             | [34] |
| Genotype Tissue Expression                              | SES: lower leg (n=700)<br>NSES: Suprapubic (n=604) | <i>PPARA</i> = 0.232 (2.20E-04)<br><i>PPARD</i> = 0.195 (5.57E-04)<br><i>PPARG</i> = 0.303 (3.02E-06)   | Tissue-specific TPM downloaded [www.gtportal.org]. DEG calculated using edgeR (DEApp website: <a href="http://yanli.shinyapps.io/DEApp/">yanli.shinyapps.io/DEApp/</a> ) | [28] |
| Zou et al 2021                                          | SES: (n=6)<br>NSES: (n=6)                          | <i>PPARA</i> = ND<br><i>PPARD</i> = ND<br><i>PPARG</i> = ND                                             | Illumina HiSeq 4000 with 150 bp paired-end reads. DEGs defined as genes with  log2Fold change  > 2, FDR < 0.05, and Padj < 0.05.                                         | [35] |
| <b>Human Actinic Keratosis (AK) vs Normal skin</b>      |                                                    |                                                                                                         |                                                                                                                                                                          |      |
| STUDY                                                   | SAMPLE TYPE                                        | PPAR Expression<br>Log2FC (Adj p-value)<br>or (Exp p-value)*                                            | METHODOLOGY                                                                                                                                                              | REF  |

|                    |                          |                                                                                                            |                                                                                 |      |
|--------------------|--------------------------|------------------------------------------------------------------------------------------------------------|---------------------------------------------------------------------------------|------|
| E-MTAB-5678        | AK (n=13)<br>NES (n=4)   | <i>PPARA</i> = -0.200 (7.12E-01)*<br><i>PPARD</i> = 3.800 (8.99E-36)*<br><i>PPARG</i> = -1.400 (1.74E-03)* | Whole transcriptome, RNAseq (500 ng), Illumina HiSeq 2500, (100 bp, paired-end) | [76] |
| GSE98774           | AK (n=18)<br>SES (n=20)  | <i>PPARA</i> = -0.217 (3.87E-01)<br><i>PPARD</i> = 1.045 (6.08E-05)<br><i>PPARG</i> = -0.304 (5.87E-01)    | Affymetrix Human Genome U133 Plus 2.0 Array                                     | UN   |
| GSE84293           | AK (n=10)<br>SES (n=7)   | <i>PPARA</i> = -0.732 (5.00E-01)<br><i>PPARD</i> = 0.018 (1.00E00)<br><i>PPARG</i> = -1.003 (6.66E-01)     | Whole transcriptome, Illumina HiSeq 2000                                        | [72] |
| Bailey et al, 2023 | AK (n=14)<br>SES (n=26)  | <i>PPARA</i> = -0.252 (3.15E-01)<br><i>PPARD</i> = 1.102 (3.96E-05)<br><i>PPARG</i> = -0.399 (5.69E-01)    | Whole transcriptome, RNAseq (0.5 – 1.0 µg), Illumina HiSeq2000                  | [77] |
| GSE2503            | AK (n=5)<br>Normal (n=5) | <i>PPARA</i> = -0.955 (5.23E-01)<br><i>PPARD</i> = 1.889 (2.64E-01)<br><i>PPARG</i> = -3.145 (1.72E-01)    | Affymetrix Human Genome U133A Array                                             | [78] |
| GSE32628           | AK (n=14)<br>SES (n=13)  | <i>PPARA</i> = 0.005 (6.81E-01)<br><i>PPARD</i> = 0.161 (2.80E-04)<br><i>PPARG</i> = 0.364 (3.44E-03)      | Illumina Human WG6 v2 Expression BeadChips                                      | [79] |
| GSE108008          | AK (n=10)<br>SES (n=10)  | <i>PPARA</i> = 0.046 (1.00E00)<br><i>PPARD</i> = 0.357 (1.00E00)<br><i>PPARG</i> = 0.247 (1.00E00)         | Affymetrix GeneChip Human Gene 2.0 ST Array                                     | [80] |

| GSE142108                                                            | AK (n=15)<br>NES (n=15)          | <i>PPARA</i> = 0.052 (8.85E-01)<br><i>PPARD</i> = 0.285 (6.42E-01)<br><i>PPARG</i> = 0.489 (6.99E-01)        | Affymetrix Clariom S Assay, Human                                               | [75] |
|----------------------------------------------------------------------|----------------------------------|--------------------------------------------------------------------------------------------------------------|---------------------------------------------------------------------------------|------|
| <b>Human cutaneous squamous cell carcinoma (cSCC) vs Normal skin</b> |                                  |                                                                                                              |                                                                                 |      |
| STUDY                                                                | SAMPLE TYPE                      | <i>PPAR</i> Expression<br>Log2FC (Adj p-value)<br>or (Exp p-value)*                                          | METHODOLOGY                                                                     | REF  |
| E-MTAB-5678                                                          | cSCC (n=5)<br>NES (n=4)          | <i>PPARA</i> = -0.100 (8.23E-01)*<br><i>PPARD</i> = 3.300 (3.45E-41)*<br><i>PPARG</i> = -0.200 (5.63E-01)*   | Whole transcriptome, RNAseq (500 ng), Illumina HiSeq 2500, (100 bp, paired-end) | [76] |
| GSE84293                                                             | cSCC (n=9)<br>SES (n=7)          | <i>PPARA</i> = -1.233 (7.04E-03)<br><i>PPARD</i> = 0.104 (9.49E-01)<br><i>PPARG</i> = -2.289 (9.84E-05)      | Illumina HiSeq 2000 (Homo sapiens)                                              | [72] |
| Hu et al 2022                                                        | cSCC (n=3)<br>Adjacent SES (n=3) | <i>PPARA</i> = -1.684 (2.68E-01)*<br><i>PPARD</i> * = 1.128 (6.94E-01)*<br><i>PPARG</i> = -1.598 (4.66E-01)* | mRNA & lncRNA array. CapitalBio Technology Human lncRNA Array V4                | [81] |
| Bailey et al, 2023                                                   | cSCC (n=66)<br>SES (n=26)        | <i>PPARA</i> = -0.960 (6.75E-13)<br><i>PPARD</i> = 1.043 (1.043E-11)<br><i>PPARG</i> = -2.234 (1.23E-10)     | Whole transcriptome, RNAseq (0.5 – 1.0 µg), Illumina HiSeq2000                  | [77] |
| GSE139505                                                            | cSCC (n=9)<br>Normal skin (n=7)  | <i>PPARA</i> = -0.369 (1.84E-01)<br><i>PPARD</i> = 1.244 (2.13E-09)<br><i>PPARG</i> = -1.134 (8.77E-02)      | Whole transcriptome, RNAseq, Illumina NextSeq 500 (Homo sapiens)                | [82] |
| GSE108008                                                            | cSCC (n=10)<br>SES (n=10)        | <i>PPARA</i> = -0.117 (6.78E-01)                                                                             | Affymetrix GeneChip Human Gene 2.0 ST Array                                     | [80] |

|                            |                                   |                                                                                                         |                                                           |      |
|----------------------------|-----------------------------------|---------------------------------------------------------------------------------------------------------|-----------------------------------------------------------|------|
|                            |                                   | <i>PPARD</i> = 0.734 (1.06E-02)<br><i>PPARG</i> = -0.818 (1.39E-03)                                     |                                                           |      |
| GSE125285                  | SCC (n=10)<br>Adjacent SES (n=10) | <i>PPARA</i> = -0.284 (5.52E-01)<br><i>PPARD</i> = 0.767 (1.70E-03)<br><i>PPARG</i> = -2.791 (3.89E-05) | Illumina HiSeq 2000 (Homo sapiens)                        | [83] |
| GSE2503                    | cSCC (n=5)<br>SES (n=5)           | <i>PPARA</i> = 0.168 (8.88E-01)<br><i>PPARD</i> = 1.447 (7.15E-02)<br><i>PPARG</i> = -2.579 (1.38E-01)  | cDNA, Affymetrix Human Genome U133A Array                 | [78] |
| GSE45164                   | cSCC (n=10)<br>Normal (n=3)       | <i>PPARA</i> = -0.125 (6.08E-01)<br><i>PPARD</i> = 0.551 (2.78E-01)<br><i>PPARG</i> = -0.299 (4.65E-01) | cDNA, Affymetrix Human Genome U133A 2.0 Array             | [84] |
| GSE32628                   | cSCC (n=15)<br>NES (n=13)         | <i>PPARA</i> = -0.011 (7.49E-01)<br><i>PPARD</i> = 0.435 (1.39E-06)<br><i>PPARG</i> = 0.265 (1.65E-02)  | cDNA (100 ng), Illumina Human WG6 v2 Expression BeadChips | [79] |
| Haider <i>et al</i> , 2006 | cSCC (n=8)<br>SES (n=8)           | <i>PPARA</i> = ND<br><i>PPARD</i> = 0.664 (5.00E-02)*<br><i>PPARG</i> = -1.155 (5.00E-02)*              | Affymetrix U95A-set GeneChip probe array                  | [85] |
| GSE7553                    | cSCC (n=11)<br>Normal (n=4)       | <i>PPARA</i> = -1.040 (9.70E-02)<br><i>PPARD</i> = 0.954 (7.26E-02)<br><i>PPARG</i> = -3.000 (1.36E-01) | Affymetrix Human Genome U133 Plus 2.0 Array               | [86] |
| GSE53462                   | SCC (n=4)<br>Normal (n=)          | <i>PPARA</i> = -0.323 (1.53E-01)<br><i>PPARD</i> = -0.350 (1.43E-01)                                    | Illumina HiSeq 2000 (Homo sapiens)                        | [83] |

|                             |                                   | <i>PPARG</i> = -0.466 (4.99E-01)                                                                         |                                                                                               |            |
|-----------------------------|-----------------------------------|----------------------------------------------------------------------------------------------------------|-----------------------------------------------------------------------------------------------|------------|
| <b>Basal Cell Carcinoma</b> |                                   |                                                                                                          |                                                                                               |            |
| <b>STUDY</b>                | <b>SAMPLE TYPE</b>                | <b><i>PPAR</i> Expression<br/>Log2FC (Adj p-value)<br/>or (Exp p-value )*-</b>                           | <b>METHODOLOGY</b>                                                                            | <b>REF</b> |
| GSE125285                   | BCC (n=25)<br>Adjacent SES (n=25) | <i>PPARA</i> = -0.557 (9.60E-04)<br><i>PPARD</i> = -0.504 (2.14E-07)<br><i>PPARG</i> = -2.77 (2.38E-16)  | Illumina HiSeq 2000 (Homo sapiens)                                                            | [83]       |
| GSE7553                     | BCC (n=15)<br>Normal (n=4)        | <i>PPARA</i> = -0.631 (2.08E-01)<br><i>PPARD</i> = 1.060 (2.29E-01)<br><i>PPARG</i> = -3.088 (6.62E-03)  | Affymetrix Human Genome U133 Plus 2.0 Array                                                   | [86]       |
| GSE6520                     | BCC (n=23)<br>Normal (n=8)        | <i>PPARA</i> = ND<br><i>PPARD</i> = ND<br><i>PPARG</i> = ND                                              | 3 subtypes of BCC [superficial (n=8), nodular (n=8), morphoeic (n=7)] included.               | [87]       |
| GSE53462                    | BCC (n=16)<br>Normal (n=5)        | <i>PPARA</i> = -0.437 (1.33E-01)<br><i>PPARD</i> = -0.535 (1.77E-02)<br><i>PPARG</i> = -0.510 (6.16E-01) | Illumina HumanHT-12 V4.0 expression beadchip                                                  | [88]       |
| GSE233744                   | BCC (n=9)<br>Normal (n=9)         | <i>PPARA</i> = ND<br><i>PPARD</i> = ND<br><i>PPARG</i> = -4.231 (3.13E-09)                               | Illumina NovaSeq 6000 (Homa sapiens). Reporting cutoffs (Fold change >2, p-value <0.05).      | UN         |
| GSE58377                    | BCC (n=13)<br>Normal (n=8)        | <i>PPARA</i> = ND<br><i>PPARD</i> = ND<br><i>PPARG</i> = -2.607 (1.64E-15)                               | Illumina HiSeq 2500: paired-end at 100 bp. Reporting cutoffs (Log2FC > Abs (1.0), FDR <0.05). | [89]       |
| <b>Epidermis Only</b>       |                                   |                                                                                                          |                                                                                               |            |
| <b>STUDY</b>                | <b>SAMPLE TYPE</b>                | <b><i>PPAR</i> Expression<br/>Log2FC (Adj p-value)<br/>or (Exp p-value )*-</b>                           | <b>METHODOLOGY</b>                                                                            | <b>REF</b> |

|                  |                                                          |                                                                                                          |                                                                            |      |
|------------------|----------------------------------------------------------|----------------------------------------------------------------------------------------------------------|----------------------------------------------------------------------------|------|
| GSE42677         | Human SCC<br>(n=10)<br><br>Normal<br>Epidermis<br>(n=10) | <i>PPARA</i> = -1.582 (3.61E-08)<br><i>PPARD</i> = 1.501 (1.62E-04)<br><i>PPARG</i> = -1.262 (6.84E-11)  | Laser microdissection: cDNA,<br>Affymetrix Human Genome<br>U133A 2.0 Array | [36] |
| GSE42677         | Human AK<br>(n=5)<br><br>Normal<br>Epidermis<br>(n=10)   | <i>PPARA</i> = -1.543 (5.65E-05))<br><i>PPARD</i> = 1.308 (6.43E-05)<br><i>PPARG</i> = -1.014 (6.59E-04) | Laser microdissection: cDNA,<br>Affymetrix Human Genome<br>U133A 2.0 Array | [36] |
| UN = unpublished |                                                          |                                                                                                          |                                                                            |      |
