# Supplementary material for: Loss of PPARγ Expression and Signaling Is a Key Feature of Cutaneous Actinic Disease and Squamous Cell Carcinoma: Association With Tumor Stromal Inflammation
Source: Preprints.org preprint supplement (doi:10.20944/preprints202407.0153.v1), 2024-07-02
Supplement: Supplementary file 5 [file supplementary]

Figure S2: Single Cell RNA Sequencing Data Summary for *Pparg*<sup>-/-epi</sup> (KO) mouse skin.

10,228

Estimated Number of Cells

49,564

Mean Reads per Cell

2,989

Median Genes per Cell

|                               |             |
|-------------------------------|-------------|
| Sequencing ?                  |             |
| Number of Reads               | 506,940,549 |
| Number of Short Reads Skipped | 0           |
| Valid Barcodes                | 97.7%       |
| Valid UMIs                    | 100.0%      |
| Sequencing Saturation         | 52.5%       |
| Q30 Bases in Barcode          | 95.8%       |
| Q30 Bases in RNA Read         | 93.7%       |
| Q30 Bases in UMI              | 95.3%       |

|                                                |       |
|------------------------------------------------|-------|
| Mapping ?                                      |       |
| Reads Mapped to Genome                         | 95.9% |
| Reads Mapped Confidently to Genome             | 92.5% |
| Reads Mapped Confidently to Intergenic Regions | 4.9%  |
| Reads Mapped Confidently to Intronic Regions   | 19.7% |
| Reads Mapped Confidently to Exonic Regions     | 67.9% |
| Reads Mapped Confidently to Transcriptome      | 65.1% |
| Reads Mapped Antisense to Gene                 | 1.6%  |

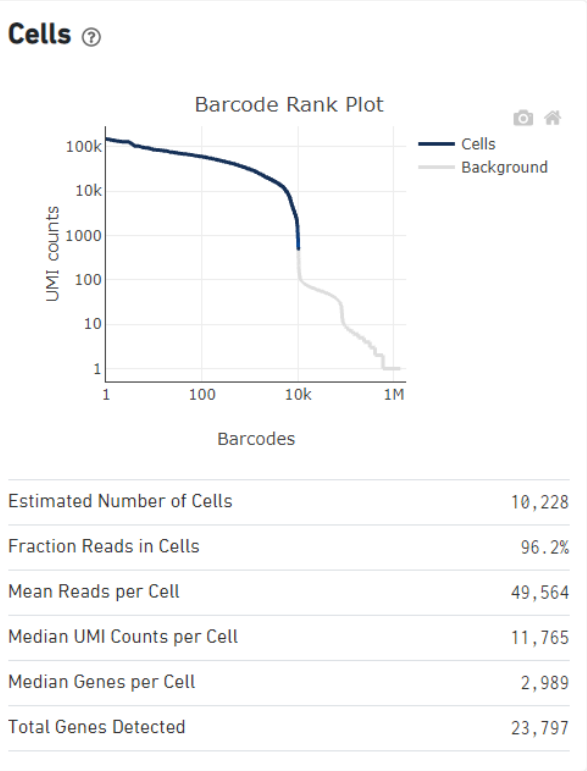

|                    |                                         |
|--------------------|-----------------------------------------|
| Sample             |                                         |
| Sample ID          | KO                                      |
| Sample Description |                                         |
| Chemistry          | Single Cell 3' v3                       |
| Include introns    | False                                   |
| Reference Path     | ...index/v4.0.0/refdata-gex-mm10-2020-A |
| Transcriptome      | mm10-2020-A                             |
| Pipeline Version   | cellranger-6.1.1                        |
