# Supplementary material for: Loss of PPARγ Expression and Signaling Is a Key Feature of Cutaneous Actinic Disease and Squamous Cell Carcinoma: Association With Tumor Stromal Inflammation
Source: Preprints.org preprint supplement (doi:10.20944/preprints202407.0153.v1), 2024-07-02
Supplement: Supplementary file 6 [file supplementary]

**Table S3: Cluster identification**

| Enrichr Cluster Cell ID (Non-keratinocyte, non-CD45+) |                           |         |                  |                | Cell #/genotype and % of non-Keratinocyte |               |             |               |
|-------------------------------------------------------|---------------------------|---------|------------------|----------------|-------------------------------------------|---------------|-------------|---------------|
| Cluster                                               | Identified Cell Type      | Overlap | Adjusted P-value | Combined Score | <i>Pparg</i> <sup>-/-</sup> epi           | %             | WT          | %             |
| 1                                                     | Fibroblasts               | 26/232  | 3.94E-21         | 1036.57        | 909                                       | 13.05%        | 2878        | 40.38%        |
| 3                                                     | Fibroblasts               | 33/232  | 8.26E-31         | 2063.53        | 311                                       | 4.47%         | 414         | 5.81%         |
|                                                       | Pericytes                 | 25/155  | 1.24E-24         | 1795.36        |                                           |               |             |               |
| 4                                                     | Melanocytes               | 13/133  | 3.43E-09         | 382.06         | 301                                       | 4.32%         | 231         | 3.24%         |
|                                                       | Smooth Muscle Cells       | 12/169  | 4.17E-07         | 207.19         |                                           |               |             |               |
|                                                       | Pericytes                 | 11/155  | 9.54E-07         | 189.55         |                                           |               |             |               |
|                                                       | Mast Cells                | 13/235  | 9.54E-07         | 146.6          |                                           |               |             |               |
| 5                                                     | Fibroblasts               | 33/232  | 9.00E-31         | 2063.53        | 182                                       | 2.61%         | 349         | 4.90%         |
| 9                                                     | Fibroblasts               | 24/232  | 1.40E-18         | 826.03         | 187                                       | 2.69%         | 288         | 4.04%         |
|                                                       | Endothelial Cells (Aorta) | 17/185  | 2.88E-12         | 459.61         |                                           |               |             |               |
| 10                                                    | Adipocytes                | 33/210  | 3.05E-32         | 2430.03        | 219                                       | 3.14%         | 212         | 2.97%         |
|                                                       | Fibroblasts               | 33/232  | 4.70E-31         | 2063.53        |                                           |               |             |               |
| 16                                                    | Pancreatic Stellate Cells | 16/111  | 2.10E-14         | 897.99         | 193                                       | 2.77%         | 16          | 0.22%         |
|                                                       | Fibroblasts               | 18/232  | 8.21E-12         | 369.17         |                                           |               |             |               |
| 18                                                    | Smooth Muscle Cells       | 33/169  | 1.25E-35         | 3480.92        | 25                                        | 0.36%         | 55          | 0.77%         |
| 20                                                    | Fibroblasts               | 48/232  | 1.70E-54         | 6471.63        | 1025                                      | 14.72%        | 379         | 5.32%         |
|                                                       | Pancreatic Stellate Cells | 39/111  | 3.73E-54         | 12275.53       |                                           |               |             |               |
| 21                                                    | Fibroblasts               | 28/232  | 8.66E-24         | 1281.13        | 540                                       | 7.75%         | 850         | 11.93%        |
|                                                       |                           |         |                  | <b>Sum</b>     | <b>3892</b>                               | <b>55.89%</b> | <b>5672</b> | <b>79.58%</b> |

| Enrichr Cluster Cell ID (CD45+)/CD3(-) |                                  |         |                  |                           | Cell #/genotype and % of non-Keratinocyte |               |            |               |
|----------------------------------------|----------------------------------|---------|------------------|---------------------------|-------------------------------------------|---------------|------------|---------------|
| Cluster                                | Identified Cell Type             | Overlap | Adjusted P-value | Combined Score            | <i>Pparg</i> <sup>-/-</sup> epi           | % Total       | WT         | % Total       |
| 6                                      | Neutrophils                      | 51/151  | 8.68E-71         | 16862.98                  | 488                                       | 7.01%         | 6          | 0.08%         |
| 7                                      | Macrophages                      | 54/204  | 1.47E-68         | 11869.25                  | 293                                       | 4.21%         | 191        | 2.68%         |
|                                        | Microglia                        | 45/158  | 2.66E-58         | 10206.96                  |                                           |               |            |               |
|                                        | Monocytes                        | 46/176  | 6.89E-58         | 9057.66                   |                                           |               |            |               |
| 11                                     | Langerhans Cells                 | 22/123  | 2.68E-22         | 1830.78                   | 250                                       | 3.59%         | 165        | 2.32%         |
| 14                                     | Dendritic Cells                  | 47/199  | 1.70E-56         | 7848.04                   | 157                                       | 2.25%         | 177        | 2.48%         |
|                                        | Macrophages                      | 46/204  | 1.76E-54         | 7022.2                    |                                           |               |            |               |
| 22                                     | Macrophages                      | 60/204  | 4.44E-80         | 17071.57                  | 694                                       | 9.97%         | 457        | 6.41%         |
|                                        | Myeloid-derived Suppressor Cells | 43/112  | 2.99E-62         | 16748.92                  |                                           |               |            |               |
|                                        |                                  |         |                  | <b>CD45(+)/CD3(-) Sum</b> | <b>1882</b>                               | <b>27.02%</b> | <b>996</b> | <b>13.98%</b> |

Table S3 (Continued)

| Enrichr Cluster Cell ID (CD45(+)/CD3(+)) |                        |         |                  |                | Cell #/genotype and % of non-Keratinocyte |        |      |        |
|------------------------------------------|------------------------|---------|------------------|----------------|-------------------------------------------|--------|------|--------|
| Cluster                                  | Identified Cell Type   | Overlap | Adjusted P-value | Combined Score | <i>Pparg</i> <sup>-/-</sup> epi           | %      | WT   | %      |
| 12                                       | T Cells                | 43/165  | 2.63E-53         | 8166.93        | 220                                       | 3.16%  | 185  | 2.60%  |
|                                          | T Memory Cells         | 40/133  | 1.61E-52         | 9515.05        |                                           |        |      |        |
| 15                                       | T Cells                | 61/165  | 8.56E-89         | 26960.51       | 227                                       | 3.26%  | 101  | 1.42%  |
|                                          | NK Cells               | 59/157  | 1.83E-86         | 26281.46       |                                           |        |      |        |
|                                          | T Memory Cells         | 54/133  | 4.51E-81         | 26507.54       |                                           |        |      |        |
|                                          | Natural Killer T Cells | 47/118  | 1.29E-69         | 20546.75       |                                           |        |      |        |
| 24                                       | T Cells                | 60/165  | 1.07E-86         | 25364.92       | 743                                       | 10.67% | 173  | 2.43%  |
|                                          | T Memory Cells         | 53/133  | 9.10E-79         | 24760.25       |                                           |        |      |        |
| CD45(+)/CD3(+) Sum                       |                        |         |                  |                | 1190                                      | 17.09% | 459  | 6.44%  |
| CD45+ Sum                                |                        |         |                  |                | 3072                                      | 44.11% | 1455 | 20.42% |

| Enrichr Cluster Cell ID (Keratinocytes) |                      |         |                  |                | Cell #/genotype and % of Keratinocyte |        |      |        |
|-----------------------------------------|----------------------|---------|------------------|----------------|---------------------------------------|--------|------|--------|
| Cluster                                 | Identified Cell Type | Overlap | Adjusted P-value | Combined Score | <i>Pparg</i> <sup>-/-</sup> epi       | %      | WT   | %      |
| 2                                       | Keratinocytes        | 19/127  | 1.58E-17         | 1154.35        | 652                                   | 31.67% | 962  | 22.06% |
| 8                                       | Epithelial Cells     | 25/218  | 1.78E-17         | 626.1          | 295                                   | 14.33% | 187  | 4.29%  |
|                                         | Basal Cells          | 11/141  | 5.82E-06         | 136.77         |                                       |        |      |        |
|                                         | Keratinocytes        | 10/127  | 1.47E-05         | 126.77         |                                       |        |      |        |
| 13                                      | Keratinocytes        | 23/127  | 1.68E-23         | 1968.58        | 150                                   | 7.29%  | 1301 | 29.84% |
|                                         | Basal Cells          | 23/141  | 1.07E-22         | 1656.79        |                                       |        |      |        |
| 17                                      | Keratinocytes        | 34/127  | 6.27E-42         | 6205.59        | 36                                    | 1.75%  | 84   | 1.93%  |
| 19                                      | Sebocytes            | 5/124   | 0.059469         | 34.39          | 0                                     | 0.00%  | 18   | 0.41%  |
| 23                                      | Keratinocytes        | 36/127  | 1.28E-45         | 7407.51        | 310                                   | 15.06% | 806  | 18.49% |
| 25                                      | Keratinocytes        | 15/127  | 5.11E-12         | 605.47         | 222                                   | 10.78% | 666  | 15.28% |
| 26                                      | Keratinocytes        | 29/127  | 3.37E-33         | 3844.71        | 394                                   | 19.14% | 336  | 7.71%  |
| Sum                                     |                      |         |                  |                | 2059                                  | 100.0% | 4360 | 100.0% |
