# Supplementary figures and images for: Loss of PPARγ Expression and Signaling Is a Key Feature of Cutaneous Actinic Disease and Squamous Cell Carcinoma: Association With Tumor Stromal Inflammation
Source: Preprints.org preprint supplement (doi:10.20944/preprints202407.0153.v1), 2024-07-02

Figure S1: Single Cell RNA Sequencing Data Summary for Wildtype (WT) mouse skin

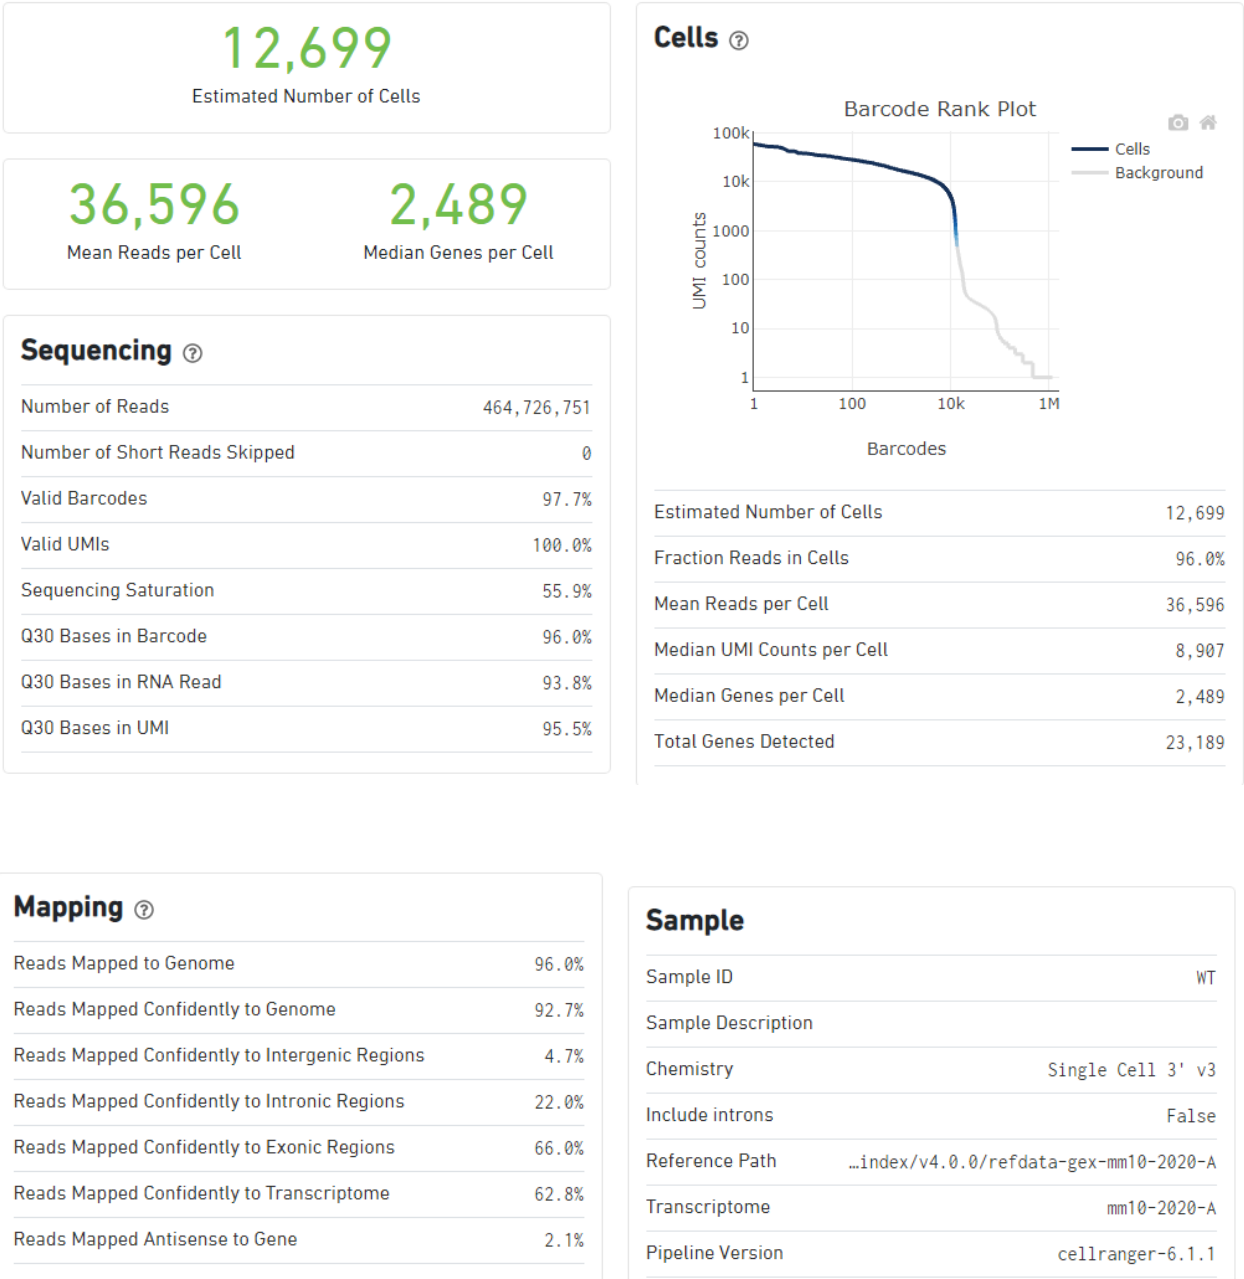

Supplement: Supplementary file 1 [file supplementary]
